# Supplementary material
Source: publisher site journal article supplement (https://bdj.pensoft.net/article/download/suppl/7373863/)
Supplement: Supplementary file

3 August 2021

Dear Gerlien Verhaegen

Thank you for your request to reproduce a figure from one of our monographs.

The *NIWA Biodiversity Memoir (NBM) Series* is licensed under the Creative Commons Attribution-NonCommercial-NoDerivs 3.0 Unported License. To view a copy of this license, visit <http://creativecommons.org/licenses/by-nc-nd/3.0/>. As such, you are free to copy and redistribute the material in any medium or format under the following terms:

- (1) You must give appropriate credit to the NBM series and indicate if changes were made to the figure, in the caption
- (2) You may not use the material for commercial purposes
- (3) If you remix, transform, or build upon the material, you may not distribute the modified material

This letter grants you permission to modify and/or reproduce images and/or other materials previously published in the *NIWA Biodiversity Memoir (NBM) Series* (previously known as the New Zealand Oceanographic Institute Memoir, and the New Zealand Department of Scientific and Industrial Research Bulletin).

- (1) Please list the *NIWA Biodiversity Memoir* from which the materials are requested: [Schuchert, P. \(1996\) The marine fauna of New Zealand: Athecate hydroids and their medusae \(Cnidaria, Hydrozoa\). New Zealand Oceanographic Institute Memoir 106, 147 pp.](#)
- (2) Please list the requested materials below: [NBM 106, Fig. 22](#)
- (3) Please provide a credit line in your caption or acknowledgements, indicating if any changes have been made to the figure, as per the following example: [Figure 22 is reproduced from Schuchert, P. \(1996\) NIWA Biodiversity Memoir 106, 1–147, with permission from Dr Michelle Kelly, Editor, NIWA Biodiversity Memoir Series.](#)

With kindest regards



Michelle Kelly, PhD, DSc (Science)  
Managing editor - *NIWA Marine Biodiversity Memoir Series*



Dr. Gerlien Verhaegen  
Japan Agency for Marine-Earth Science and Technology (JAMSTEC)
